# Supplementary material for: Chromosomal microarray analysis supplements exome sequencing to diagnose children with suspected inborn errors of immunity
Source: Front Immunol. 2023 May 5;14:1172004. doi: 10.3389/fimmu.2023.1172004 (PMC10196392; doi:10.3389/fimmu.2023.1172004)
Supplement: Supplementary file 2 [file Table_1.xlsx]

## Sheet: Sheet1
Participant code	Has diagnostic CNV on CMA	Sex	Copy number variant(s)	Human Phenotype Ontology Terms
S2258929	Yes	F	arr 9p24.3(210253-317136)x1	Otitis media|Eczema|Atopic dermatitis|Seborrheic dermatitis|Gastroesophageal reflux|Pneumonia|Asthma|Recurrent upper respiratory tract infections|Recurrent bronchitis|Allergic rhinitis|Increased circulating IgE level|Thymic hormone decreased|Decreased circulating antibody level|Recurrent candida infections|Increased B cell count|Recurrent bacterial skin infections|Absent specific antibody respons…
S5696835	Yes	M	arr 15q22.33(67473997-67481381)x1 pat_x000D_ arr 17q12(34841209-36151346)x3 pat	Submucous cleft hard palate|Myopia|Abnormal sclera morphology|Irritability|Anxiety|Thin skin|Arachnodactyly|Pes planus|Respiratory distress|Asthma|Arnold-Chiari malformation|Recurrent fractures|Allergic rhinitis|Aortic aneurysm|Arterial tortuosity|Joint hyperflexibility|Allergic conjunctivitis|Dermal translucency|Broad uvula|Fatigue|Rhinitis
S4896433	Yes	M	arr 9p24.3q21.11(115981-70901873)x3	Glomerulonephritis|Nephrotic syndrome|Failure to thrive in infancy|Lymphopenia|Autoimmune hemolytic anemia|Fever|Autoimmune thrombocytopenia|Diarrhea|Hypokalemia|Hypomagnesemia|Decreased circulating antibody level|Chronic tubulointerstitial nephritis
S5334530	Yes	M	arr 2p25.3(42444-565634)x4 arr 7q11.23(74188119-74203794)x3 arr 9p24.3(211086-703693)x0	Eczema|Skin rash|Intussusception|Exertional dyspnea|Short stature|Poor appetite|Chronic oral candidiasis|Cough|Cutaneous abscess|Irregular dentition|Cellulitis
S2174752	Yes	F	arr 17p12(14111772-15442069)x3	Sinusitis|Otitis media|Skin rash|Pneumonia|Allergic rhinitis|Rhinitis|Coccidioidal meningitis
S6703475	Yes	M	arr 10q23.31(89851273-90855104)x1 mat	Eczema|Splenomegaly|Thrombocytopenia|Autoimmune hemolytic anemia|Pneumonia|Hepatomegaly|Lymphadenopathy|Arthralgia
S0600549	Yes	M	arr 16p11.2(29673956-30199664)x3	Recurrent otitis media|Global developmental delay|Gastroesophageal reflux|Recurrent pneumonia|Chronic sinusitis
S1308487	Yes	M	arr 10q23.31(90771628-90815977)x1 pat	Hepatosplenomegaly|Splenomegaly|Thrombocytopenia|Neutropenia|Anemia|Hypertriglyceridemia|Lymphadenopathy
S8763051	Yes	F	arr[GRCh37] 10p13(14987006_14996917)x0	Failure to thrive|Neutropenia|Lymphopenia|Iron deficiency anemia|Chronic diarrhea|Immunodeficiency|Severe combined immunodeficiency|Severe B lymphocytopenia
S2442477	Yes	M	arr 1q42.3q43(234747397-239456926)x1_x000D_ arr 4p14(39431694-39573393)x3_x000D_ arr 20p13(368226-377991)x1	Enuresis|Diarrhea|Pneumonia|Asthma|Bronchiectasis|Chronic rhinitis|Febrile seizure (within the age range of 3 months to 6 years)|Lymphadenopathy|Decreased circulating IgA level|Immune dysregulation|Chronic bronchitis|Recurrent pneumonia|Allergy|Cough|Esophagitis
S6911406	Yes	M	arr 1p36.23p36.22(8231915-9780171)x3_x000D_ arr 1p36.22p36.21(11074422-12763756)x3	Gingival overgrowth|Recurrent otitis media|Eczema|Failure to thrive|Pancreatitis|Inflammation of the large intestine|Respiratory distress|Asthma|Bronchiectasis|Colitis|Immunodeficiency|Adenomatous colonic polyposis|Chronic gastritis|Recurrent pneumonia|Perianal abscess|Inflammatory abnormality of the skin|Cough|Bloody diarrhea|Wheezing|Rhinorrhea|Pulmonary histoplasmosis|Crohn\u0027 s disease|Eso…
S3277789	Yes	M	arr Xp21.1p11.4(37473737-37644155)x0 arr 17q12(34181958-34184241)x1 arr Xp22.31(6488721-8097511)x2	Bruising susceptibility|Portal hypertension|Tachycardia|Splenomegaly|Fever|Diarrhea|Abdominal pain|Recurrent infections|Fatigue|Increased inflammatory response|Liver abscess
S3014542	Yes	M	arr 9p24.3(311862-340315)x0	Conjunctivitis|Eczema|Fever|Pneumonia|Bronchiectasis|Recurrent pneumonia|Stomatitis|Recurrent sinusitis|Rhinitis|Cough|Cervical lymphadenopathy|Molluscum contagiosum|Cheilitis|Food allergy
S4939706	Yes	M	arr 12q12(46189647-46339053)x1	Pneumonia|Recurrent infections|Immunodeficiency|Decreased circulating antibody level|Short stature|Attention deficit hyperactivity disorder|Chronic sinusitis|Cough|Rhinorrhea
S4154908	Yes	F	arr Xp21.1p11.4(34551214-38352080)x1	Sinusitis|Otitis media|Recurrent otitis media|Strabismus|Rod-cone dystrophy|Myopia|Cone/cone-rod dystrophy|Exotropia|Global developmental delay|Encephalopathy|Failure to thrive|Vomiting|Nausea and vomiting|Pneumonia|Recurrent infections|Osteomyelitis|Poor appetite|Recurrent pneumonia|Recurrent sinusitis|Abnormal circulating ornithine concentration|Fatigue|Aphthous ulcer|Methicillin-resistant Stap…
S4796685	Yes	F	arr[GRCh37] 5p15.2(13922477_13923557)x1_x000D_ arr[GRCh37] 6q16.1(95988600_96246106)x1_x000D_ arr[GRCh37] 8p12(29053624_29059147)x1	Ovarian cyst|Recurrent otitis media|Bronchiectasis|Recurrent lower respiratory tract infections|Chronic sinusitis|Ciliary dyskinesia|Cough|Abnormal sputum
S3780156	Yes	M	arr[GRCh37] 2q33.2q33.3(204169244_207244380)x1	Autistic behavior|Seizure|Thrombocytopenia|Neutropenia|Pancytopenia|Microcytic anemia|Lymphadenopathy|Follicular hyperplasia|Recurrent upper respiratory tract infections|Attention deficit hyperactivity disorder|Cough|Lymphocytosis
S1403674	Yes	M	arr[GRCh37] 16p11.2(28493787_28495303)x4 mat	Visual loss|Amblyopia|Delayed speech and language development|Seizure|Gait disturbance|Bilateral tonic-clonic seizure|Deficit in phonologic short-term memory
S1595037	No	F	arr 19q13.33(48317767-48389721)x1_x000D_ arr 21q21.3(27066103-27066463)x1	High palate|Dolichocephaly|Micrognathia|Osteoporosis|Thin skin|Soft skin|Atopic dermatitis|Atrophic scars|Arachnodactyly|Generalized hypotonia|Ventricular septal defect|Mitral valve prolapse|Talipes equinovarus|Pes planus|Abdominal pain|Asthma|Aortic root aneurysm|Recurrent fractures|Vertebral fusion|Allergic rhinitis|Decreased body weight|Carotid artery tortuosity|Spinal instability|Dermal trans…
S0488719	No	F	arr 16q23.3q24.1(84179233-84473250)x3	Chronic otitis media|Eczema|Urticaria|Atopic dermatitis|Asthma|Allergic rhinitis|Allergic conjunctivitis|Inflammatory abnormality of the skin|Low levels of vitamin D|Esophagitis|Angioedema|Food allergy
S8644533	No	M	arr 15q13.3(32037769-32443078)x3	Eczema|Failure to thrive|Autoimmune hemolytic anemia|Chronic diarrhea|Increased circulating IgE level|Lymphoid interstitial pneumonia
S5052398	No	F	arr 15q13.3(32037769-32443078)x3	Uveitis|Skin rash|Hepatic fibrosis|Hepatosplenomegaly|Obesity|Thrombocytopenia|Lymphopenia|Fever|Hepatomegaly|Vascular dilatation|Lymphoma|Abnormal trachea morphology|Elevated hepatic transaminase|Increased circulating IgA level|Increased circulating IgM level|Intermittent thrombocytopenia|Bone marrow hypocellularity|Abnormal pulmonary Interstitial morphology|Hepatitis|Anterior uveitis|Abnormalit…
S6404247	No	M	arr 15q13.3(32037769-32443078)x3	Abnormality of the genital system|Hearing impairment|Coloboma|Adrenal insufficiency|Global developmental delay|Splenomegaly|Thrombocytopenia|Neutropenia|Leukopenia|Lymphopenia|Anemia|Unexplained fevers|Immunodeficiency|Immune dysregulation|Autoimmunity|Severe combined immunodeficiency|Combined immunodeficiency|Microtia|Hepatitis|Severe viral infection
S6953951	No	F	arr 19q13.33(48836336-48852615)x1	Splenomegaly|Lymphadenopathy
S1117118	No	F	arr 19p13.2(10469818-10472192)x3	High palate|Low-set ears|Recurrent otitis media|Conductive hearing impairment|Downslanted palpebral fissures|Abnormality of the optic nerve|Global developmental delay|Premature birth|Tachycardia|Constipation|Gastroesophageal reflux|Pneumonia|Asthma|Fair hair|Aortic root aneurysm|Elevated hepatic transaminase|Vertebral fusion|Allergic rhinitis|Short stature|Ventricular tachycardia|Pulmonary artery…
S1072657	No	F	arr 20p12.1(14597701-14964518)x1	Visual impairment|Abnormality of refraction|Anxiety|Pectus excavatum|Muscle weakness|Tremor|Joint hypermobility|Iron deficiency anemia|Gastroesophageal reflux|Asthma|Bronchiectasis|Fasciculations|Gastroparesis|Deep venous thrombosis|Scoliosis|Allergic rhinitis|Chronic intestinal candidiasis|Recurrent sinopulmonary infections|Persistence of primary teeth|Attention deficit hyperactivity disorder|Ch…
S2059279	No	M	arr 19q13.32(47791625-47850386)x1	High palate|Joint swelling|Bicuspid aortic valve|Exocrine pancreatic insufficiency|Eosinophilia|Recurrent fever|Abdominal pain|Intermittent diarrhea|Headache|Aortic root aneurysm|Recurrent aphthous stomatitis|Recurrent sinusitis|Rhinitis|Allergy|Exercise-induced asthma|Lymphoid nodular hyperplasia
S4367036	No	F	arr 2q13(110886672-110964737)x1	Abnormality of the nervous system|Precocious puberty|Eczema|Skin rash|Urticaria|Meningitis|Nasal obstruction|Dysphagia|Abdominal pain|Migraine without aura|Lymphadenopathy|Exercise intolerance|Recurrent viral infections|Recurrent pneumonia|Limb pain|Recurrent sinusitis|Mosaic attenuation pattern on pulmonary HRCT|Rhinorrhea|Severe viral infection|Disseminated viral infection|Molluscum contagiosum…
S1814847	No	F	arr 14q32.2(100380484-100408118)x1	Sinusitis|Otitis media|Recurrent otitis media|Skin rash|Urticaria|Atopic dermatitis|Alopecia|Nasal obstruction|Unexplained fevers|Diarrhea|Pneumonia|Asthma|Allergic rhinitis|Abdominal distention|Recurrent pneumonia|Recurrent sinusitis|Inflammatory abnormality of the skin|Rhinitis|Allergy|Cough|Sneeze|Chest tightness|Anaphylactic shock|Oral mucosal blisters|Food allergy|Food-induced anaphylaxis
S5076410	No	F	arr 12q21.2q21.31(80086703-85361897)x1	Oral ulcer|Postnatal growth retardation|Recurrent aphthous stomatitis|Crohn\u0027 s disease
S2213770	No	M	arr 6p25.2(2890178-2896437)x1	Microcephaly|Primary hypothyroidism|Palmoplantar hyperkeratosis|Vitiligo|Alopecia|Exocrine pancreatic insufficiency|Iron deficiency anemia|Myopathy|Interstitial pneumonitis|Anhidrotic ectodermal dysplasia|Chronic sinusitis|Autoimmune hypoparathyroidism|Hepatitis
S0722914	No	M	arr[GRCh37] 2p13.1p12(74247256_75822265)x3	Proteinuria|Gingival overgrowth|Sinusitis|Acute sinusitis|Nephrolithiasis|Hypertension|Insulin resistance|Osteoporosis|Dry skin|Failure to thrive|Growth delay|Overgrowth|Nasal obstruction|Splenomegaly|Weight loss|Lymphopenia|Thrombocytosis|Anemia|Palpitations|Nausea|Constipation|Gastroesophageal reflux|Abdominal pain|Chronic diarrhea|Hypertriglyceridemia|Vertigo|Hypokalemia|Vertebral compression …
S7204000	No	F	arr 19p13.3(1021328-1123558)x1	Hyperopic astigmatism|Restrictive cardiomyopathy|Splenomegaly|Asplenia|Thrombocytopenia|Hemolytic anemia|Eosinophilia|Reticulocytosis|Fever|Leukocytosis|Diarrhea|Pneumonia|Restrictive ventilatory defect|Pulmonary arterial hypertension|Bronchiectasis|Hepatomegaly|Constrictive pericarditis|Lymphadenopathy|Respiratory failure|Decreased circulating IgG level|Short stature|Chronic lung disease|Recurre…
S8331268	No	M	arr 17p13.2(5636297-6203874)x1	Hydrocele testis|Hepatic steatosis|Atrial septal defect|Patent ductus arteriosus|Splenomegaly|Fever|Constipation|Abdominal pain|Pneumonia|Back pain|Splenic abscess|Splenic cyst|Hernia
S8628966	No	M	arr 17q22(55669918-55897721)x3	Eczema|Pneumonia|Recurrent fungal infections|Allergic rhinitis|Respiratory tract infection|Allergy|Cough|Wheezing|Verrucae
S0994502	No	F	arr 11q23.3(116597406-116672362)x1_x000D_ arr 12p13.32(4476681-4493347)x1	Recurrent urinary tract infections|Hydronephrosis|Oral ulcer|Tinnitus|Hearing abnormality|Syncope|Recurrent skin infections|Diarrhea|Vertigo|Chronic oral candidiasis|Allergy|Cough|Cutaneous abscess|Cyclic neutropenia|Cellulitis
S8851849	No	M	arr 2q21.3(136147901-136549121)x3_x000D_ arr 10q21.1(54527960-54529175)x1	Irritability|Eczema|Atopic dermatitis|Nasal obstruction|Asthma|Allergic rhinitis|Attention deficit hyperactivity disorder|Inflammatory abnormality of the skin|Fatigue|Allergy|Cough|Sneeze|Rhinorrhea|Anaphylactic shock|Food allergy|Food-induced anaphylaxis
S2937635	No	M	arr 1p13.2(114372206-114373841)x1_x000D_ arr 19q13.13(38578016-38580481)x1	Sinusitis|Recurrent otitis media|Hyperthyroidism|Weight loss|Gastroesophageal reflux|Chronic diarrhea|Celiac disease|Lymphadenopathy|Recurrent infections|Chronic mucocutaneous candidiasis|Abnormal blood ion concentration|Chronic oral candidiasis|Pilonidal abscess|Crohn\u0027 s disease
S6555024	No	F	arr 2p12(79130016-79269820)x3	Chronic otitis media|Recurrent otitis media|Joint hypermobility|Splenomegaly|Thrombocytopenia|Neutropenia|Anemia|Lymphadenopathy|Arthralgia|Short stature|Decreased body weight|Mandibular osteomyelitis|Recurrent sinusitis|Monocytosis|Pharyngitis|Increased size of nasopharyngeal adenoids
S7568990	No	M	arr 9q33.1(118990882-119251299)x1	Recurrent otitis media|Umbilical hernia|Splenomegaly|Thrombocytopenia|Neutropenia|Anemia|Neutropenia in presence of anti-neutropil antibodies|Reticulocytosis|Autoimmune thrombocytopenia|Pneumonia|Hepatomegaly|Lymphadenopathy|Short stature|Decreased body weight|Hepatitis
S4003847	No	M	arr 17q25.1(73840335-73878686)x1_x000D_ arr 19q13.33(49702396-49704206)x1	Splenomegaly|Lymphopenia|Anemia|Pulmonary infiltrates|Hepatomegaly|Lymphadenopathy|Elevated hepatic transaminase
S3870105	No	M	arr 5q31.1(130921859-130957801)x1_x000D_ arr 6q24.1(140442547-140722719)x1	Hearing impairment|Eczema|Skin rash|Urticaria|Diarrhea|Abdominal pain|Bronchiectasis|Pulmonary infiltrates|Inflammatory abnormality of the skin|Respiratory tract infection|Pain|Esophagitis
S5148168	No	M	arr 6q22.1(117481312-117819238)x1	Irritability|Global developmental delay|Mental deterioration|Motor delay|Confusion|Generalized hypotonia|Weight loss|Neutropenia|Fever|Cerebral atrophy|Gait imbalance|Global brain atrophy|Headache|EEG abnormality|Lower limb hyperreflexia|Recurrent upper respiratory tract infections|Upper limb muscle weakness|Poor appetite|Lactose intolerance|Poor fine motor coordination|Foot dorsiflexor weakness|…
S6503804	No	M	arr 3p14.1(66428075-66829101)x3	Hepatosplenomegaly|Failure to thrive|Growth delay|Splenomegaly|Weight loss|Fever|Bronchiectasis|Recurrent infections|Easy fatigability|Gastritis|Abnormality of the musculature of the limbs|Recurrent sinusitis|Recurrent mycobacterium avium complex infections|Cough|Cervical lymphadenopathy
S4007583	No	F	arr 6p21.33(31582711-31584770)x1	Sinusitis|Delayed eruption of permanent teeth|Eczema|Seizure|Poor appetite|Recurrent mycobacterial infections|Fatigue|Pain|Cough|Bronchial atresia|Recurrent ear infections
S1085758	No	F	arr 4q35.2(189374480-190767114)x1	Abnormality of the eye|Keratitis|Conjunctivitis|Neutropenia|Fever|Elevated hepatic transaminase|Increased circulating IgA level|Increased circulating IgM level|Lymphoproliferative disorder|Bone marrow hypocellularity|Abnormality of bone marrow cell morphology|Conjunctival nodule|Increased circulating antibody level|Fatigue|Corneal ulceration|Pharyngitis|Knee pain|Oligoclonal T cell expansion|Chro…
S1596286	No	M	arr Xp22.31(6488721-8097511)x2	Anxiety|Growth delay|Eosinophilia|Anemia|Dehydration|Vomiting|Pyloric stenosis|Abdominal pain|Chronic diarrhea|Asthma|Bronchiectasis|Short stature|Abnormality of body weight|Gastritis|Recurrent sinopulmonary infections|Recurrent pneumonia|Fatigue|Nonproductive cough|Chest pain|Latex allergy
S1289947	No	F	arr 17q21.2(40525956-40526205)x1	Dry skin|Atopic dermatitis|Allergic rhinitis|Nuchal cord|Food allergy
S9102008	No	M	arr 8p23.1(8111027-8255544)x1	Eczema|Asthma|Seasonal allergy|Food allergy
S8432648	No	F	arr 5q13.2(70307077-70309855)x0	Recurrent otitis media|Anxiety|Hypoparathyroidism|Skin rash|Chronic mucocutaneous candidiasis|Hypocalcemia|Hypoplasia of dental enamel|Onychomycosis
S4351735	No	M	arr 19p13.12(15586898-15587725)x1	Eczema|Splenomegaly|Anemia|Autoimmune thrombocytopenia|Leukocytosis|Elevated hepatic transaminase|Monocytosis
S5134296	No	F	arr 2q13(113885019-113888581)x1	High palate|Pruritus|Atopic dermatitis|Recurrent skin infections|Nasal obstruction|Asthma|Sleep disturbance|Allergic rhinitis|Epiphora|Inflammatory abnormality of the skin|Seasonal allergy|Sneeze|Lichenification|Food allergy
S2282984	No	F	arr 8p22(17010270-17145542)x1	Abnormal sternum morphology|Pectus excavatum|Pericardial effusion|Fever|Pneumonia|Respiratory distress|Asthma|Pulmonary infiltrates|Pleural effusion|Headache|Increased circulating IgE level|Poor appetite|Recurrent pneumonia|Recurrent bronchopulmonary infections|Episodic fatigue|Abnormal natural killer cell count
S0052643	No	M	arr 4p16.1(10522414-10525133)x1	Hydroureter|Vesicoureteral reflux|Hydronephrosis|Hypertelorism|Hypertension|Skin rash|Urticaria|Hypermelanotic macule|Splenomegaly|Iron deficiency anemia|Poliosis|Lymphadenopathy|Depressed nasal bridge|Flushing|Papule|Cutaneous mastocytosis|Physical urticaria
S4414423	No	M	arr Xp22.33p22.2(2744701-11286217)x2 mat	Cleft palate|Narrow palate|Bifid uvula|Dolichocephaly|Abnormality of dental enamel|Anxiety|Thin skin|Umbilical hernia|Ventricular septal defect|Bicuspid aortic valve|Pes planus|Scoliosis|Aortic aneurysm|Arterial tortuosity|Joint hyperflexibility|Chronic constipation
S2651937	No	F	arr 9q32(115636161-115899927)x1	Otitis media|Skin rash|Pruritus|Atopic dermatitis|Eosinophilia|Dysphagia|Asthma|Cutis marmorata telangiectatica congenita|Wheezing|Flushing|Esophagitis
S1692071	No	F	arr Xp21.1(32967915-35296972)x3	Oral ulcer|Hematuria|Skin rash|Papilledema|Meningitis|Fever|Frontal bossing|Pneumonia|Increased circulating IgE level|Back pain|Increased B cell count|Stomatitis|Pedal edema|Recurrent aphthous stomatitis|Elevated C-reactive protein level|Pyuria|Pain|Increased circulating osteocalcin level|Abnormality of the tympanic membrane|Increased head circumference|Inflammatory abnormality of the eye|Recurre…
S4642194	No	M	arr 21q22.11(32536938-32776404)x1	Atopic dermatitis|Failure to thrive|Asthma|Allergic rhinitis|Food allergy
S2133323	No	F	arr 15q26.1(90773400-90776935)x1_x000D_ arr Xq28(154124170-154528181)x3	Acne|Paresthesia|Abnormal blistering of the skin|Epiphora|Allergy|Seasonal allergy|Macule|Cutaneous mastocytosis
S1959382	No	F	arr 2q13(110886672-110964737)x1	Recurrent otitis media|Nasal obstruction|Lymphopenia|Lymphadenopathy|Recurrent infections|Immunodeficiency|Decreased proportion of CD4-positive helper T cells|Lymphoproliferative disorder|Recurrent pneumonia|Recurrent sinusitis|Tonsillitis|Cough|Snoring|Cervical lymphadenopathy|Rhinorrhea|Severe Epstein Barr virus infection
S0218307	No	M	arr 20p13(368226-377991)x1	Hearing impairment|Recurrent otitis media|Delayed speech and language development|Hyperactivity|Eczema|Pruritus|Gait imbalance|Febrile seizure (within the age range of 3 months to 6 years)|Recurrent upper respiratory tract infections|Localized skin lesion|Cellulitis|Otitis externa
S7133510	No	M	arr 15q13.1(28164204-28232452)x1	Delayed speech and language development|Mental deterioration|Autoimmune hemolytic anemia|Unexplained fevers|Autoimmune thrombocytopenia|Asthma|Recurrent pneumonia|Recurrent sinusitis
S6746434	No	M	arr 15q21.2(49912769-50013996)x1	Recurrent otitis media|Global developmental delay|Anemia|Pneumonia|Recurrent bacterial infections|Recurrent upper respiratory tract infections|Recurrent viral infections|Reduced factor XII activity|Schizencephaly|Reduced factor IX activity|Cervical lymphadenopathy|Lupus anticoagulant|Chronic infection|Severe Epstein Barr virus infection|Cerebral palsy
S8589005	No	F	arr 4p14(39405955-39472606)x3	Skin rash|Pruritus|Urticaria|Atopic dermatitis|Diarrhea|Abdominal pain|Asthma|Macular hyperpigmentation|Bronchiolitis|Dermatographic urticaria|Bronchitis|Lower limb pain|Macule|Darier\u0027 s sign|Wheezing|Flushing|Cutaneous abscess|Elevated total serum tryptase|Skin plaque
S8946629	No	M	arr 17q25.3(76098159-76115615)x3	Skin rash|Pruritus|Atopic dermatitis|Acne|Asthma|Allergic rhinitis|Inflammatory abnormality of the skin|Food allergy|Food-induced anaphylaxis
S4827788	No	F	arr 17q25.1(73840335-73878686)x1	Hydroureter|Diarrhea|Nausea|Constipation|Gastroesophageal reflux|Abdominal pain|Colitis|Allergic rhinitis|Cutaneous mastocytosis
S6965094	No	M	arr 11p15.5(2045727-2330944)x3 mat_x000D_ arr 16p11.2(29633373-30197957)x3 mat_x000D_ arr 20p13(368226-377991)x1 pat	Epistaxis|Choanal atresia|Failure to thrive|Subglottic stenosis|Inflammation of the large intestine|Abnormal lung morphology|Hematochezia|Colitis|Decreased circulating antibody level|Stridor|Aspiration pneumonia|Wheezing|Erosion of oral mucosa
S1997850	No	M	arr 20q11.23(36902488-36984370)x1	Atopic dermatitis|Failure to thrive|Asthma|Allergic rhinitis|Food allergy
S6451658	No	F	arr 7p22.2(2955458-3411740)x3	Kyphosis
S4934971	No	M	arr 9q34.3(140796573-141018984)x3	Recurrent otitis media|Autistic behavior|Anxiety|Adrenal insufficiency|Eosinophilia|Gastroesophageal reflux|Pneumonia|Asthma|Bronchiectasis|Recurrent respiratory infections|Recurrent infections|Allergic rhinitis|Increased circulating IgE level|Recurrent sinopulmonary infections|Chronic lung disease|Tonsillitis|Bronchiolitis|Wheezing|Adenoiditis|Recurrent bronchiolitis|Nasal polyposis
S5378153	No	F	arr 22q13.32q13.33(48812153-49834561)x3	Gingivitis|Macrocephaly|Mandibular prognathia|Posteriorly rotated ears|Low-set ears|Conductive hearing impairment|Downslanted palpebral fissures|Dental malocclusion|Hypothyroidism|Growth hormone deficiency|Adrenal insufficiency|Panhypopituitarism|Osteoporosis|Global developmental delay|Generalized hypotonia|Intrauterine growth retardation|Laryngomalacia|Pes planus|Abnormal facial shape|Vomiting|R…
S2800535	No	M	arr 5q35.2(172891927-173143430)x1	Nephropathy|Oral ulcer|Hydrocephalus|Macrocephaly|Hearing impairment|Epistaxis|Strabismus|Visual loss|Carious teeth|Papilledema|Global developmental delay|Meningitis|Hepatosplenomegaly|Premature birth|Anemia|Fever|Leukocytosis|Dysphagia|Pneumonia|Immunodeficiency|Arthralgia|Recurrent bronchitis|Elevated hepatic transaminase|Neonatal hyperbilirubinemia|Enterocolitis|Meningoencephalocele|Generalize…
S0483130	No	M	arr[GRCh37] 1p32.1(59190475_59252296)x1	Eczema|Skin rash|Pruritus|Atopic dermatitis|Nasal obstruction|Abdominal pain|Sleep disturbance|Neonatal respiratory distress|Allergic rhinitis|Inflammatory abnormality of the skin|Feeding difficulties|Dermatographic urticaria|Sneeze|Heart murmur|Rhinorrhea|Gastrointestinal eosinophilia|Abdominal cramps|Severe infection|Low levels of vitamin D|Food allergy|Food-induced anaphylaxis
S7720172	No	M	arr 2p14p13.3(68572109-68624230)x3	Sinusitis|Recurrent otitis media|Delayed speech and language development|Hepatosplenomegaly|Neutropenia|Iron deficiency anemia|Anemia|Pneumonia|Asthma|Lymphadenopathy|Recurrent infections|Easy fatigability|Bone marrow hypocellularity|Recurrent sinusitis|Bronchitis|Recurrent pharyngitis|Verrucae
S2997715	No	M	arr 3q29(195765193-197317103)x1	Delayed speech and language development|Pneumonia|Recurrent infections|Septic arthritis|Recurrent sinopulmonary infections|Folliculitis|Cellulitis
S0589448	No	M	arr Xp22.31(6488721-8097511)x2	Oral ulcer|Aggressive behavior|Obsessive-compulsive behavior|Anxiety|Eczema|Urticaria|Abdominal pain|Asthma|Headache|Allergic rhinitis|Increased circulating IgE level|Allergic conjunctivitis|Allergy|Seasonal allergy|Exercise-induced asthma|Verrucae|Drug allergy|Food allergy
S2298275	No	M	arr 20p13(368226-377991)x1	Carious teeth|Keratoconjunctivitis sicca|Tachycardia|Nasal obstruction|Weight loss|Anemia|Palpitations|Leukocytosis|Diarrhea|Nausea and vomiting|Abdominal pain|Inflammation of the large intestine|Respiratory distress|Bronchiectasis|Abnormal duodenum morphology|Intermittent diarrhea|Chronic rhinitis|Immunodeficiency|Recurrent fractures|Arthralgia|Gastritis|Recurrent pneumonia|Attention deficit hyp…
S2663391	No	F	arr 5q31.1(130934268-130968521)x3	Pruritus|Atopic dermatitis|Asthma|Allergic rhinitis|Low levels of vitamin D|Nut food product allergy
S4816279	No	F	arr 9p24.3(267916-328073)x1 mat_x000D_ arr 19p13.3(537965-770382)x3 mat	Anxiety|Atopic dermatitis|Failure to thrive|Eosinophilia|Esophageal stricture|Asthma|Dysgammaglobulinemia|Increased circulating IgE level|Decreased circulating antibody level|Short stature|Recurrent herpes|Decreased proportion of CD4-positive helper T cells|Recurrent pneumonia|Chronic oral candidiasis|Abnormal immunoglobulin level|Recurrent sinusitis|Cutaneous abscess|Severe viral infection|Sever…
S1432396	No	F	arr 3p26.3(2685713-2784078)x1	Diabetes mellitus|Skin rash|Alopecia|Fever|Fatigue|Panniculitis|Decreased body mass index|Lipoatrophy|Type I diabetes mellitus
S0869750	No	F	arr Xq21.33(96096220-96411854)x3	Iron deficiency anemia|Fever|Headache|Lymphadenopathy|Arthralgia|Cervical lymphadenopathy
S3455269	No	M	arr 12p13.31(7832511-7903675)x3	Abnormal testis morphology|Hydrocephalus|Hearing impairment|Conductive hearing impairment|Uveitis|Blindness|Carious teeth|Delayed speech and language development|Skin rash|Atopic dermatitis|Seizure|Meningitis|Arthritis|Growth delay|Thrombocytopenia|Anemia|Fever|Hepatomegaly|Increased intracranial pressure|Colitis|Scoliosis|Lymphadenitis|Septic arthritis|Rhabdomyolysis|Short stature|Abnormal pulmo…
S8831142	No	F	arr 22q13.2(42817697-42829817)x1	Syncope|Tachycardia|Fever|Gastroesophageal reflux|Inflammation of the large intestine|Respiratory distress|Bronchiectasis|Hypotension|Scoliosis|Recurrent infections|Recurrent lower respiratory tract infections|Laryngeal cleft|Exercise-induced muscle fatigue|Abnormal autonomic nervous system physiology|Chronic constipation|Reduced ejection fraction|Chills|Night sweats
S9482409	No	F	arr 17q21.1(38252525-38252659)x1	Increased inflammatory response
S5069371	No	F	arr 22q11.21(18915409-19010508)x1	Epistaxis|Obsessive-compulsive behavior|Pruritus|Urticaria|Abdominal pain|Inflammatory abnormality of the skin|Dermatographic urticaria|Fatigue|Flushing|Mastocytosis|Esophagitis|Cutaneous mastocytosis|Epigastric pain
S7111583	No	F	arr 9q34.3(140447749-140450434)x1	Proteinuria|Adrenal insufficiency|Osteopenia|Failure to thrive|Bicuspid aortic valve|Iron deficiency anemia|Anemia|Microcytic anemia|Fever|Vertebral compression fractures|Abnormal circulating lipid concentration|Low-molecular-weight proteinuria|Increased serum ferritin|Elevated erythrocyte sedimentation rate|Pulmonary artery dilatation|obsolete Severe viral infections|Increased intraabdominal fat…
S6394514	No	F	arr[GRCh37] 8p12(33210384_33396310)x3 arr[GRCh37] 15q11.2(22770408_23066099)x1	Diplopia|Vomiting|Nausea|Headache|Paresthesia|Back pain|Weakness of facial musculature|Cryptococcal meningitis
S0309881	No	M	arr 7q36.1(151626565-151873650)x3	Splenomegaly|Thrombocytopenia|Neutropenia|Lymphadenopathy|Elevated hepatic transaminase|Lymphoproliferative disorder|Disseminated viral infection
S8717320	No	F	arr 3p26.3(888059-1403848)x3 arr 12p13.31(7886957-7894123)x1	Eczema|Recurrent mycobacterium avium complex infections|Pain|Unusual infection
S7864682	No	M	arr 5q13.2(70307085-70309855)x0 arr 22q12.3(32869511-32875292)x1	Conjunctivitis|Hyperpigmentation of the skin|Skin rash|Clubbing|Growth delay|Fever|Unexplained fevers|Vomiting|Diarrhea|Lymphadenopathy|Increased serum ferritin|Intraalveolar phospholipid accumulation|Nail dystrophy|Respiratory tract infection|Panniculitis|Pain|Abnormal inflammatory response|Cough|Chronic idiopathic urticaria
S7256805	No	F	arr[GRCh37] 1q24.2(169576160_169581703)x1 arr[GRCh37] 8q23.1(108356711_108393008)x3	Eczema|Skin rash|Pruritus|Atopic dermatitis|Asthma|Allergic rhinitis|Inflammatory abnormality of the skin|Wheezing|Lichenoid skin lesion|Molluscum contagiosum|Food allergy
S1400734	No	M	arr 2q21.1(131501506-131886566)x3	Sinusitis|Hearing impairment|Constipation|Asthma|Recurrent upper respiratory tract infections
S3009013	No	M	arr 1p35.2(30255520-31337748)x3	Urinary incontinence|Polyuria|Uveitis|Behavioral abnormality|Delayed speech and language development|Bruising susceptibility|Skin rash|Periorbital hyperpigmentation|Lethargy|Anemia|Fever|Recurrent fever|Polydipsia|Diarrhea|Headache|Autoimmunity|Ankle pain|Flushing|Systolic heart murmur|Episcleritis
S0969750	No	M	arr 9p24.3(211086-422207)x1	Pneumonia|Asthma|Colitis|Recurrent infections|Immunodeficiency|Decreased circulating antibody level|Recurrent pneumonia|Pyelonephritis|Cough|Bloody diarrhea|Tooth abscess
S0997546	No	F	arr[GRCh37] 2p22.2(38297169_38389047)x1	Hearing impairment|Pectus excavatum|Cutis marmorata|Skin rash|Telangiectasia|Hepatosplenomegaly|Thrombocytopenia|Anemia|Fever|Leukocytosis|Gastroesophageal reflux|Abnormal lung morphology|Generalized joint laxity|Chronic lung disease|Brain imaging abnormality
S0830929	No	F	arr 10p15.3(378399-596534)x3	Gingival overgrowth|Failure to thrive|Neutropenia|Delayed gross motor development|Recurrent respiratory infections|Chronic oral candidiasis|Increased circulating antibody level
S6150501	No	M	arr 2q13(111408390-113098686)x1	Inguinal hernia|Carious teeth|Skin rash|Seizure|Growth delay|Chronic diarrhea|Chronic mucocutaneous candidiasis|Hypocalcemia|Abdominal distention|Poor appetite|Autoimmune hypoparathyroidism
S3437745	No	M	arr[GRCh37] 12q24.31(125299528_125304010)x1 mat_x000D_ arr[GRCh37] 20p12.3(7169988_8581852)x3 mat	Bruising susceptibility|Seizure|Spasticity|Global developmental delay|Nausea|Gastroesophageal reflux|Abdominal pain|Asthma|Immunodeficiency|Arthralgia|Decreased serum ferritin|Fatigue|Bloody diarrhea|Choking episodes|Cow milk allergy|Eosinophilic infiltration of the esophagus
S7130003	No	M	arr[GRCh37] Yp11.2(6595303_6908123)x0	Absence of intrinsic factor
S1296837	No	F	arr[GRCh37] 19q13.2(40217338_40222153)x1_x000D_ arr[GRCh37] 19q13.31(43856831_43870829)x1	Oral ulcer|Fever
S7524488	No	F	arr[GRCh37] 13q12.3(29141132_29442806)x3 mat	Recurrent urinary tract infections|Acute sinusitis|Hearing impairment|Seizure|Global developmental delay|Joint laxity|Gastroesophageal reflux|Focal impaired awareness seizure|Immunodeficiency|Obstructive sleep apnea|Allergic rhinitis|Decreased circulating antibody level|Chronic bronchitis|Chronic sinusitis|Sinus tachycardia|Ciliary dyskinesia|Chronic constipation|Pain|Cough|Chapped lip|Esophagitis
S4099038	No	M	arr 14q21.2(44650847-45083729)x1	Microcephaly|Hearing impairment|Sensorineural hearing impairment|Dry skin|Global developmental delay|Gait disturbance|Failure to thrive|Neutropenia|Lymphopenia|Pneumonia|Asthma|Postural instability|Recurrent infections|Immunodeficiency|Aspiration|Decreased circulating antibody level|Severe T-cell immunodeficiency|Recurrent pneumonia|Attention deficit hyperactivity disorder|Aspiration pneumonia|Na…
S6031230	No	F	arr 10p12.31(22075047-22192315)x1	Periodontitis|Fever|Vasculitis|Immune dysregulation|Acute bronchitis
S4962176	No	F	arr 17p13.3(716730-819752)x3	Failure to thrive|Growth delay|Anemia|Lymphadenopathy
S2906978	No	M	arr 16p13.12(14444193-14776639)x3	Inguinal hernia|Hydrocele testis|Atopic dermatitis|Asthma|Allergic rhinitis|Inflammatory abnormality of the skin|Rhinitis|Allergy|Food allergy
S6873998	No	F	arr 3q12.3(101092224-101306770)x3	Obsessive-compulsive behavior|Irritability|Pruritus|Atopic dermatitis|Respiratory distress|Asthma|Allergic rhinitis|Inflammatory abnormality of the skin|Fatigue|Exercise-induced asthma|Cough|Sneeze|Wheezing|Food allergy
S7028696	No	M	arr 20p13(3835297-3838070)x1	Skin rash|Urticaria|Clubbing|Arthritis|Eosinophilia|Fever|Abnormal lung morphology|Recurrent viral infections|Inflammatory abnormality of the skin|Cough|Abnormal pulmonary thoracic imaging finding
S5751102	No	M	arr 7p12.2(49708644-50455063)x3	Adrenal insufficiency|Immunodeficiency|Decreased circulating antibody level|Lymphoproliferative disorder
S5797500	No	F	arr[GRCh37] 6q26(162715866_163000320)x3	Pruritus|Atopic dermatitis|Asthma|Allergic rhinitis|Low levels of vitamin D|Food allergy
S6830909	No	F	arr 4q27(122734390-122738888)x3	Lymphedema|Thrombocytosis|Asthma|Celiac disease|Allergic rhinitis|Pedal edema
S9551799	No	M	arr 1q24.2(169576160-169581703)x1	Delayed speech and language development|Eczema|Skin rash|Umbilical hernia|Congestive heart failure|Cardiomyopathy|Dilated cardiomyopathy|Nasal obstruction|Fever|Abdominal pain|Pneumonia|Chronic rhinitis|Deep venous thrombosis|Lymphadenopathy|Recurrent infections|Poor appetite|Recurrent pneumonia|Pharyngitis|Night sweats|Molluscum contagiosum|Hernia
S5383581	No	M	arr 9q34.13(135549754-135703576)x3	Recurrent otitis media|Chronic rhinitis|Decreased circulating antibody level|Recurrent pneumonia|Abnormal circulating IgA level|Abnormal circulating IgG level|Partial absence of specific antibody response to tetanus vaccine|Complete or near-complete absence of specific antibody response to unconjugated pneumococcus vaccine
S0875265	No	M	arr[GRCh37] 6q22.1(116936372_116954165)x3_x000D_ arr[GRCh37] Xq21.31(86547546_87186670)x2	Asthma|Headache|Vertigo|Celiac disease|Recurrent infections|Fatigue|Allergy|Seasonal allergy
S1392063	No	F	arr 9p13.2(37960005-38355380)x3	Recurrent urinary tract infections|Clubbing|Stroke|Failure to thrive|Growth delay|Thrombocytosis|Anemia|Fever|Chronic diarrhea|Inflammation of the large intestine|Recurrent infections|Arteritis|Erythema nodosum|Cow milk allergy|Carotid artery stenosis|Food allergy
S0229382	No	F	arr[GRCh37] 15q24.2(76223116_76597469)x3	Eczema|Seizure|Cardiac arrest|Gastroesophageal reflux|Asthma|Cerebral ischemia|Anaphylactic shock|Drug allergy|Dairy allergy|Food allergy
S6748756	No	F	arr[GRCh37] 8p12(33246521_33247159)x3	Recurrent urinary tract infections|Poikiloderma|Concave nail|Gastroesophageal reflux|Hiatus hernia|Recurrent respiratory infections|Gastroparesis|Immunodeficiency|Gastritis|Pulmonary obstruction|Depigmentation/hyperpigmentation of skin|Esophagitis
S2574860	No	M	arr[GRCh37] 4p16.1(8281059_8607464)x1	Diarrhea|Gastroesophageal reflux|Abdominal pain|Chronic diarrhea|Celiac disease|Chronic pain|Esophagitis
S5409708	No	M	arr[GRCh37] 2p13.1p12(74876431_75425896)x3	Inflammation of the large intestine
S3840071	No	F	arr[GRCh37] 1p13.2(115315955_115322863)x3	Uveitis|Wrist swelling|Rheumatoid arthritis|Ankle swelling|Panuveitis|Chronic pain|Knee pain|Ankle pain
S0263842	No	M	arr[GRCh37] 11q22.3(102991194_102993728)x1	Leukopenia|Anemia|Fever|Abdominal pain|Chronic diarrhea|Inflammation of the large intestine|Pneumonia|Colitis|Intestinal bleeding|Elevated hepatic transaminase|Molluscum contagiosum|Ulcerative colitis|Drug-induced anaphylaxis|Drug allergy
S1801723	No	M	arr 9p24.3(220253-399178)x3 arr 9q21.13(74030565-74292521)x1	Skin rash|Global developmental delay|Encephalopathy|Reticulocytosis|Chorea|Gliosis|Encephalitis|Decreased circulating total IgM|Herpes simplex encephalitis|Herpes encephalitis|Abnormal vitamin B12 level|Encephalomalacia|Abnormality of movement|Lymphocytosis
S1328363	No	M	arr[GRCh37] 5q13.3(76067602_76134632)x3 mat	Dry skin|Seborrheic dermatitis|Acne|Atypical nevus|Syncope|Failure to thrive|Vomiting|Gastroesophageal reflux|Recurrent fractures|Recurrent upper respiratory tract infections|Arthralgia|Recurrent aphthous stomatitis|Recurrent sinusitis|Feeding difficulties|Keratosis pilaris|Osteochondrosis|Nasogastric tube feeding|Hernia
S4468362	No	M	arr[GRCh37] 21q22.3(46868020_47770512)x3	Eczema|Microcytic anemia|Leukocytosis|Asthma|Lymphadenopathy|Lymphadenitis|Increased circulating IgE level|Attention deficit hyperactivity disorder|Cervical lymphadenopathy|Increased basophil count|Hypereosinophilia|Granuloma
S3254720	No	M	arr[GRCh37] 17p13.1(9104395_9367505)x3_x000D_ arr[GRCh37] 17p13.1(9879031_10225270)x3	Nephrotic syndrome|Eczema|Colitis|Recurrent infections|Immunodeficiency|Recurrent pneumonia|Stomatitis|Seasonal allergy|Chronic idiopathic urticaria
S8622470	No	M	arr[GRCh37] 1q31.1(190136576_190271659)x3	Pectus excavatum|Growth delay|Vomiting|Generalized joint laxity|Increased circulating IgE level|Gastritis|Persistence of primary teeth|Food intolerance|Elevated total serum tryptase|Hypereosinophilia|Gastrointestinal eosinophilia
S9031900	No	M	arr[GRCh37] 4q31.3(151556906_151903825)x1	Otitis media|Recurrent otitis media|Eczema|Global developmental delay|Recurrent skin infections|Bronchiolitis|Methicillin-resistant Staphylococcus aureus infection
S5229130	No	M	arr[GRCh37] 10q21.1(54527960_54529175)x1	Eczema|Splenomegaly|Thrombocytopenia|Neutropenia|Hemolytic anemia|Autoimmune hemolytic anemia|Fever|Constipation|Abdominal pain|Pneumonia|Lymphadenopathy|Increased total bilirubin|Heart block
